# Supplementary material
Source: PubMed Central journal article supplement (PMC11108270)
Supplement: 18_2016_2154_MOESM1_ESM.pdf [file 18_2016_2154_MOESM1_ESM.pdf]

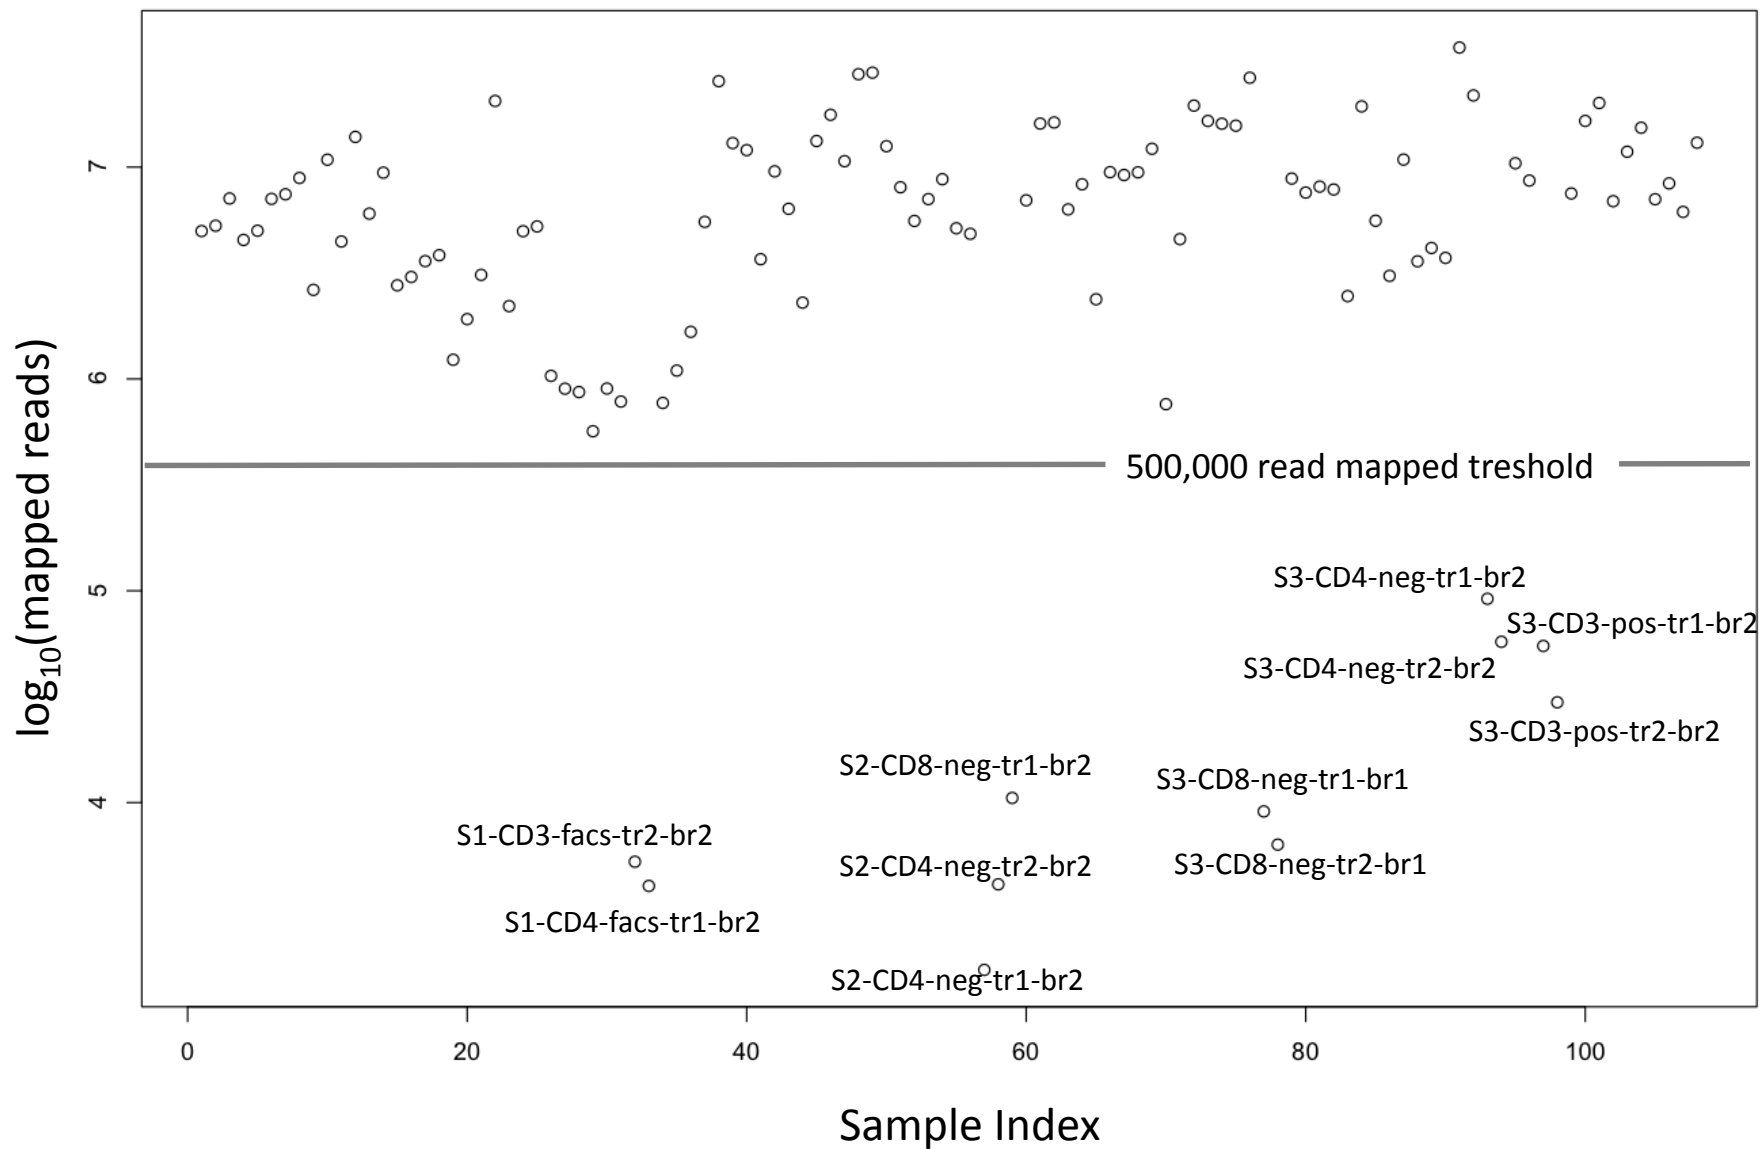

Suppl. Figure 1

Suppl.  
Figure 2

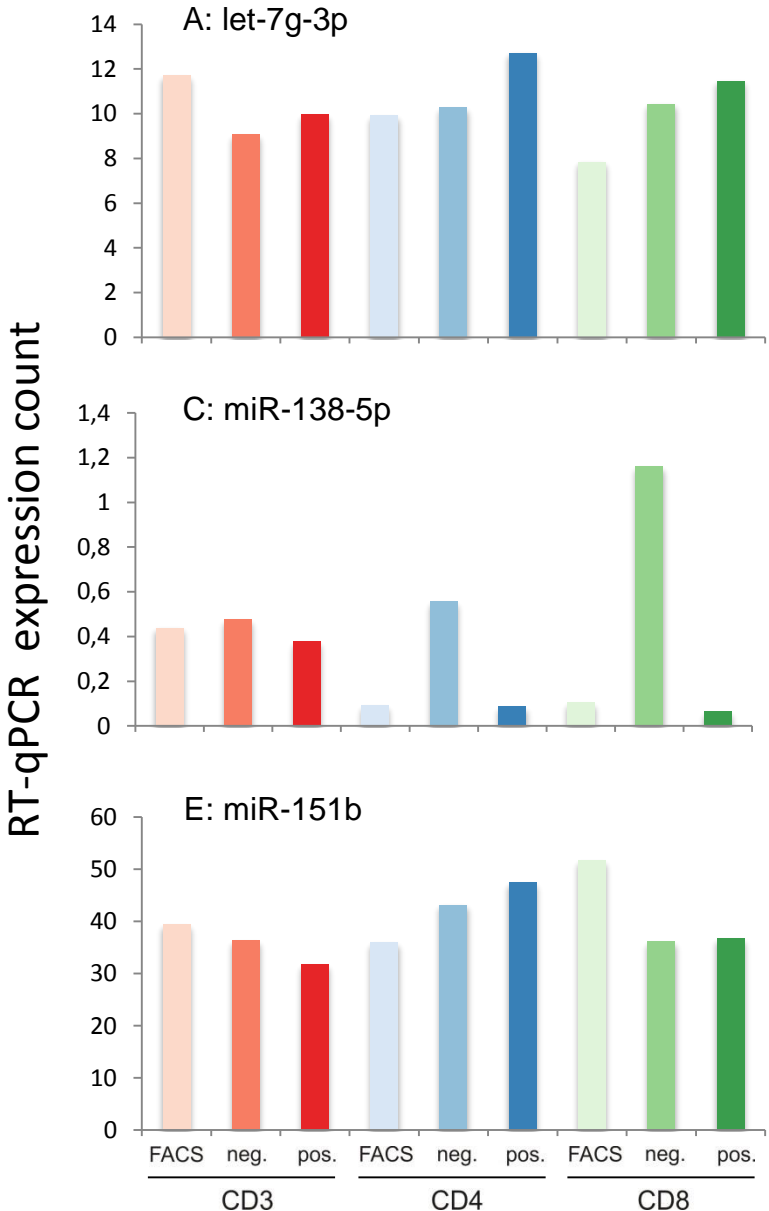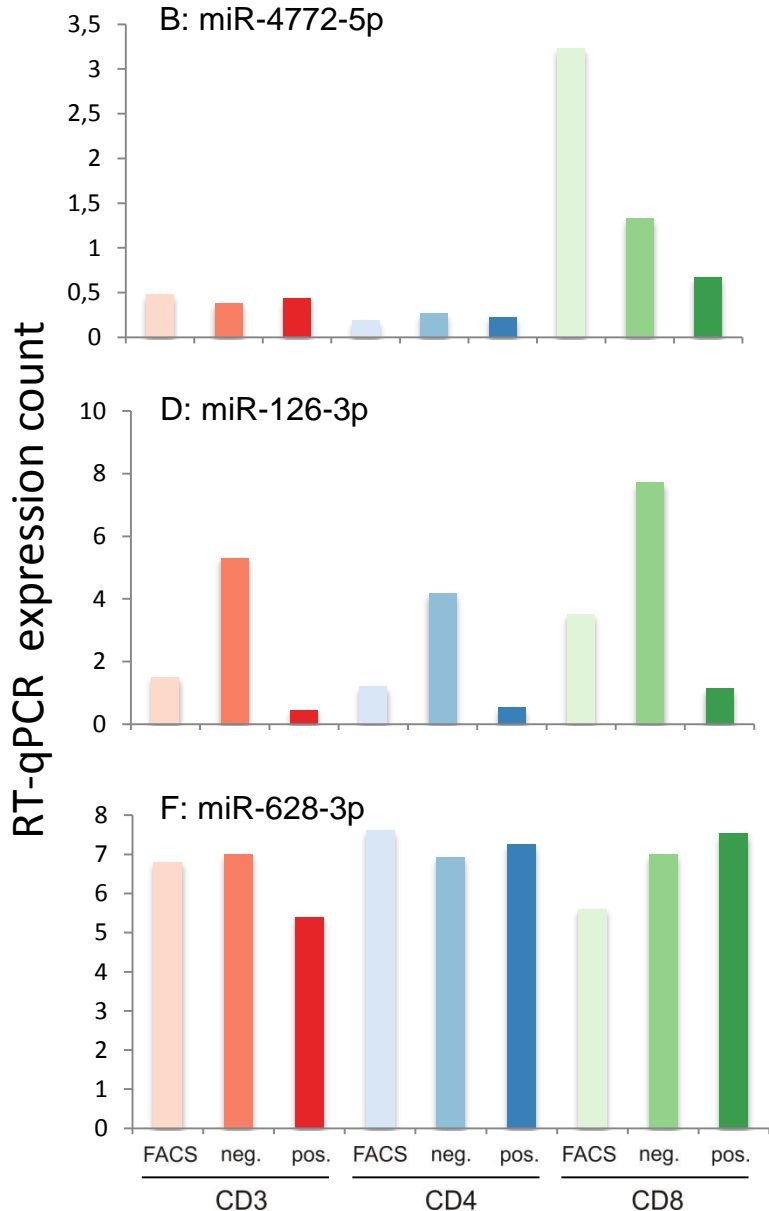

Suppl.  
Figure 3

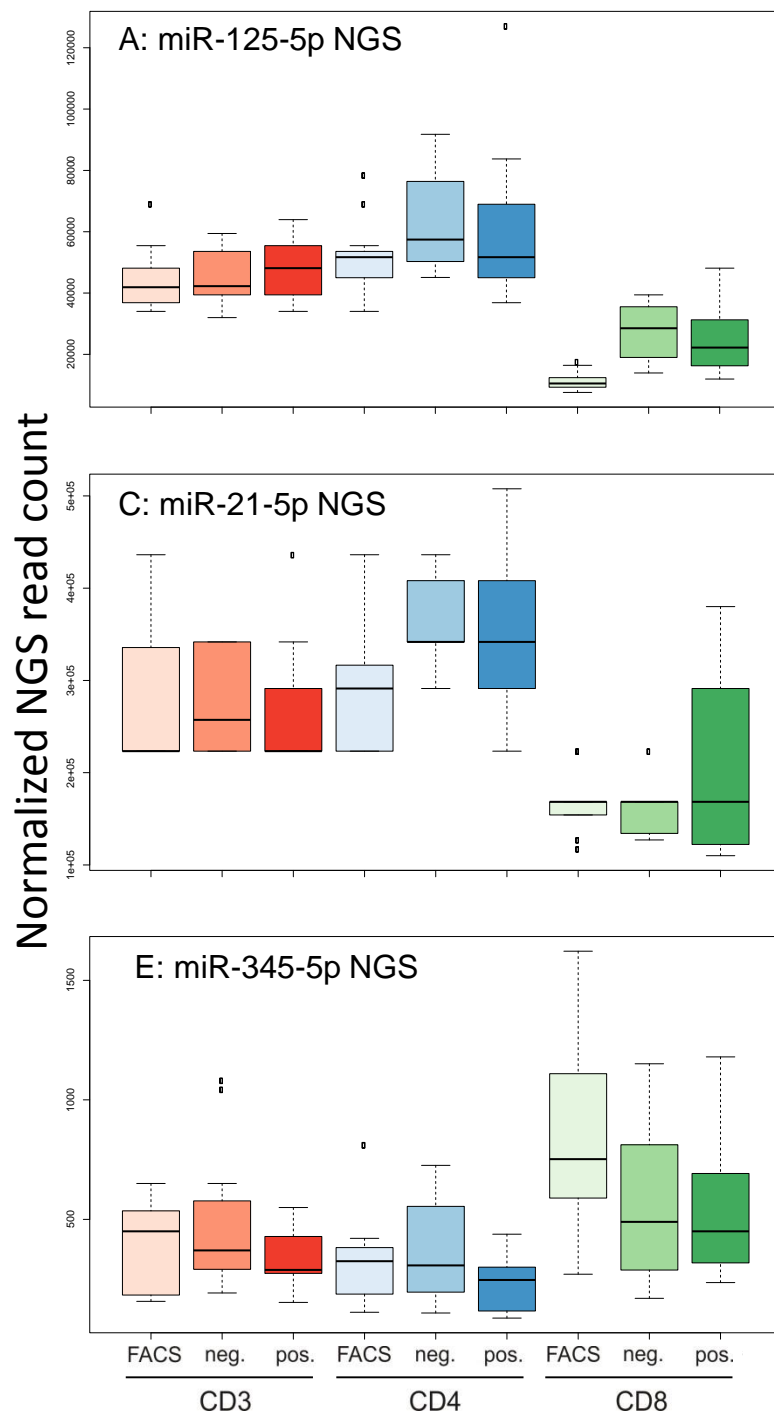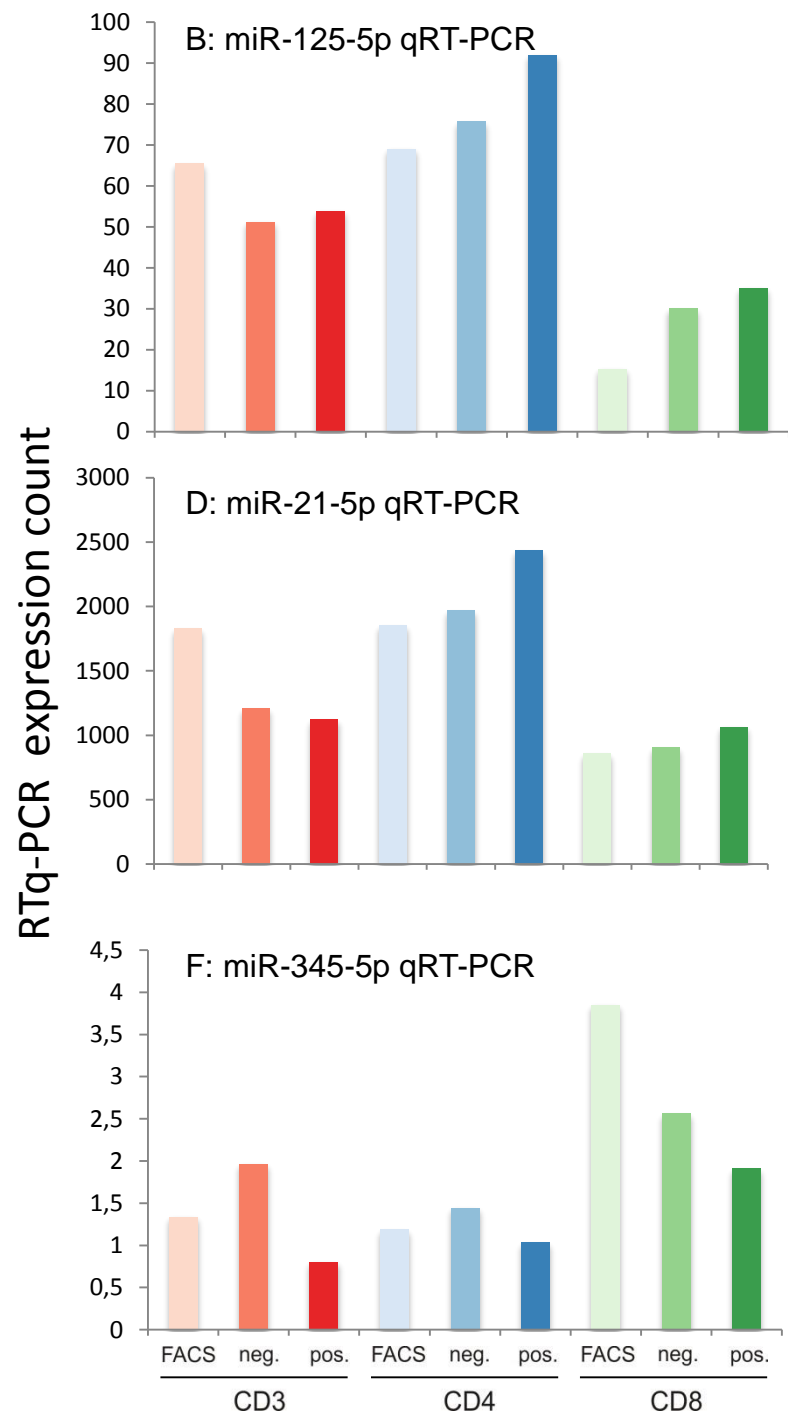

# Supp. Figure 4

- CD3-pos
- CD3-facs
- CD3-neg
- CD3-pos**
- CD3
- CD4-facs
- CD4-neg
- CD4-pos
- CD4
- CD8
- CD4-pos
- CD3
- CD3-facs
- CD3-neg
- CD3-pos
- CD4
- CD4-facs
- CD4-neg
- CD4-pos**
- CD8

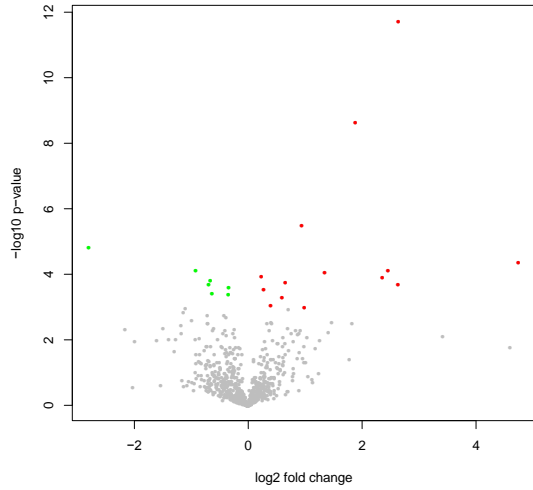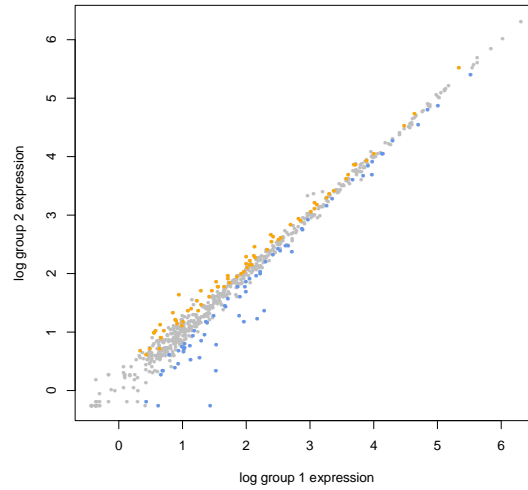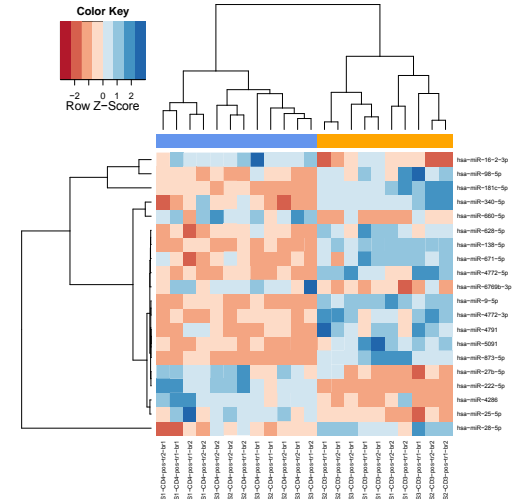

Show  entries

| miRNA           | median group 1 | median group 2 | stdv group 1 | stdv group 2 | fold change | In fold change | Wilcoxon Mann Whitney Test raw p-Value | Wilcoxon Mann Whitney Test adjusted p-Value | t-Test raw p-Value | t-Test adjusted p-Value |
|-----------------|----------------|----------------|--------------|--------------|-------------|----------------|----------------------------------------|---------------------------------------------|--------------------|-------------------------|
| hsa-miR-138-5p  | 154.14         | 17.1           | 18.04        | 14.4         | 9.01        | 2.2            | 3.0929e-06                             | 0.00055981                                  | 1.8179e-12         | 1.3161e-09              |
| hsa-miR-9-5p    | 79.81          | 19.72          | 13.65        | 11.43        | 4.05        | 1.4            | 8.6938e-05                             | 0.0057221                                   | 2.3123e-09         | 8.3704e-07              |
| hsa-miR-181c-5p | 9620.76        | 5091.8         | 1776.84      | 1001.06      | 1.89        | 0.64           | 8.4561e-05                             | 0.0057221                                   | 3.1327e-06         | 0.00075604              |
| hsa-miR-222-5p  | 9.04           | 45.01          | 2.89         | 23.43        | 0.2         | -1.6           | 3.0929e-06                             | 0.00055981                                  | 1.5159e-05         | 0.0027437               |
| hsa-miR-873-5p  | 28.16          | 0.56           | 14.39        | 1.37         | 49.89       | 3.91           | 8.6938e-05                             | 0.0057221                                   | 4.2382e-05         | 0.0061368               |
| hsa-miR-5091    | 19.12          | 3.72           | 8.28         | 1.85         | 5.14        | 1.64           | 8.6938e-05                             | 0.0057221                                   | 7.2616e-05         | 0.0075886               |
| hsa-miR-27b-5p  | 34.94          | 74.14          | 15.31        | 16.62        | 0.47        | -0.75          | 0.00060002                             | 0.020686                                    | 7.3371e-05         | 0.0075886               |
| hsa-miR-4791    | 20.33          | 7.28           | 6.38         | 3.49         | 2.79        | 1.03           | 3.7115e-05                             | 0.0044785                                   | 8.4523e-05         | 0.0076494               |
| hsa-miR-28-5p   | 13942.03       | 11446.19       | 1004.01      | 1023.73      | 1.22        | 0.2            | 0.0006897                              | 0.022698                                    | 0.00011462         | 0.0085152               |
| hsa-miR-4772-3p | 95.02          | 15.57          | 32.85        | 7.72         | 6.1         | 1.81           | 0.0001141                              | 0.0068841                                   | 0.00011761         | 0.0085152               |

Search:

Search miRNA  Search median group 1  Search median group 2  Search stdv group 1  Search stdv group 2  Search fold change  Search In fold change  Search Wilcoxon Mann W  Search Wilcoxon Mann W  Search t-Test raw p-Value  Search t-Test adjusted p-Value

| isolation of           | isolation technique | donor 1      |              | donor 2      |              | donor 3      |              | mean | sd  | mean (including technical replicates) | sd (including technical replicates) |
|------------------------|---------------------|--------------|--------------|--------------|--------------|--------------|--------------|------|-----|---------------------------------------|-------------------------------------|
|                        |                     | time point 1 | time point 2 | time point 1 | time point 2 | time point 1 | time point 2 |      |     |                                       |                                     |
| CD3 <sup>+</sup> cells | FACS_1              | 90.5         | 96.4         | 99.4         | 99.3         | 99.3         | 99.6         | 97.4 | 3.3 | 98.0                                  | 2.5                                 |
|                        | FACS_2              | 98.6         | 95.8         | 98.9         | 99.1         | 99.3         | 99.3         | 98.5 | 1.2 |                                       |                                     |
|                        | negative_1          | 83.8         | 90.0         | 96.3         | 96.5         | 97.5         | 97           | 93.5 | 5.0 | 94.0                                  | 4.4                                 |
|                        | negative_2          | 89.6         | 89.6         | 97.4         | 95.9         | 97.9         | 97           | 94.6 | 3.6 |                                       |                                     |
|                        | positive_1*         | 93.3         | 90.1         | 93.1         | 85.1         | 75.2         | 87.1         | 87.3 | 6.2 | 88.1                                  | 5.1                                 |
|                        | positive_2*         | 86.1         | 95.0         | 89.2         | 88.1         | 91.1         | 84.2         | 89.0 | 3.5 |                                       |                                     |
|                        |                     |              |              |              |              |              |              |      |     |                                       |                                     |
| CD4 <sup>+</sup> cells | FACS_1              | 99.7         | 95.8         | 99.3         | 98.2         | 99.9         | 99.7         | 98.8 | 1.4 | 98.6                                  | 1.7                                 |
|                        | FACS_2              | 99.5         | 94.5         | 99.0         | 97.8         | 99.9         | 99.8         | 98.4 | 1.9 |                                       |                                     |
|                        | negative_1          | 96.2         | 94.1         | 94.5         | 93.9         | 92.4         | 95.2         | 94.4 | 1.2 | 94.2                                  | 1.3                                 |
|                        | negative_2          | 96.4         | 92.6         | 94.1         | 93.0         | 92.8         | 94.9         | 94.0 | 1.4 |                                       |                                     |
|                        | positive_1          | 99.8         | 94.6         | 99.9         | 99.9         | 100.0        | 99.9         | 99.0 | 2.0 | 99.0                                  | 2.0                                 |
|                        | positive_2          | 99.9         | 94.2         | 99.8         | 99.9         | 99.9         | 99.9         | 98.9 | 2.1 |                                       |                                     |
|                        |                     |              |              |              |              |              |              |      |     |                                       |                                     |
| CD8 <sup>+</sup> cells | FACS_1              | 97.4         | 91.3         | 99.1         | 98.2         | 99.6         | 98.7         | 97.4 | 2.8 | 97.2                                  | 3.3                                 |
|                        | FACS_2              | 98.8         | 88.7         | 98.8         | 97.8         | 99.4         | 98.6         | 97.0 | 3.7 |                                       |                                     |
|                        | negative_1          | 83.4         | 87.4         | 87.0         | 85.9         | 75.7         | 82.2         | 83.6 | 4.0 | 83.5                                  | 4.2                                 |
|                        | negative_2          | 81.9         | 87.4         | 86.7         | 86.7         | 74.9         | 82.9         | 83.4 | 4.3 |                                       |                                     |
|                        | positive_1          | 98.4         | 96.1         | 99.8         | 99.4         | 99.4         | 98.8         | 98.7 | 1.2 | 98.3                                  | 1.4                                 |
|                        | positive_2          | 98.6         | 95.0         | n.d.         | 99.3         | 99.3         | 97.7         | 98.0 | 1.6 |                                       |                                     |
|                        |                     |              |              |              |              |              |              |      |     |                                       |                                     |

Suppl. Table 1: Purity of different samples analyzed by flow cytometry.
